# Supplementary material for: Influence of the Solvent on the Stability of Aminopurine Tautomers and Properties of the Amino Group
Source: MDPI journal article supplement (doi:10.3390/molecules28072993), 2023-03-27
Supplement: s1 [file s1]

# Supplementary Materials (SM)

## Influence of the solvent on the stability of aminopurine tautomers and properties of the amino group

Anna Jezuita<sup>1</sup>, Paweł A. Wieczorkiewicz<sup>2,\*</sup>, Tadeusz M. Krygowski<sup>3</sup> and Halina Szatyłowicz<sup>2,\*</sup>

<sup>1</sup> Faculty of Science and Technology, Jan Długosz University in Częstochowa, Al. Armii Krajowej 13/15, 42-200 Częstochowa, Poland

<sup>2</sup> Faculty of Chemistry, Warsaw University of Technology, Noakowskiego 3, 00-664 Warsaw, Poland

<sup>3</sup> Department of Chemistry, Warsaw University, Pasteura 1, 02-093 Warsaw, Poland

\* Correspondence: pawel.wieczorkiewicz.dokt@pw.edu.pl (P.A.W.); halina.szatylowicz@pw.edu.pl (H.S.)

|                                                                                                                                                                                                                                                                                                                                  |             |
|----------------------------------------------------------------------------------------------------------------------------------------------------------------------------------------------------------------------------------------------------------------------------------------------------------------------------------|-------------|
| <b>Table S1.</b> Energy values and the difference, $\Delta$ , between the coplanar and perpendicular conformations of $\text{NH}_2$ in N- $\text{NH}_2$ derivatives of purine .....                                                                                                                                              | <b>SM2</b>  |
| <b>Table S2.</b> The cSAR( $\text{NH}_2$ ) values for C2-, C6-, C8- and NX- $\text{NH}_2$ substituted purine tautomers .....                                                                                                                                                                                                     | <b>SM3</b>  |
| <b>Table S3.</b> The valence angles at the N atom and pyramidalization, angle ( $\phi$ ), values of the $\text{NH}_2$ group ( $^\circ$ ) in the gas phase (GP) and water ( $\text{H}_2\text{O}$ ), their difference, $\Delta$ , and type of proximity for C2-, C6-, C8- and NX- $\text{NH}_2$ substituted purine tautomers ..... | <b>SM4</b>  |
| <b>Table S4.</b> $d_{\text{ipso-NH}_2}$ bond lengths in the gas phase (GP) and water ( $\text{H}_2\text{O}$ ), their difference, $\Delta$ , and type of proximity for C2-, C6-, C8- and NX- $\text{NH}_2$ substituted purine tautomers .....                                                                                     | <b>SM4</b>  |
| <b>Table S5.</b> $d_{\text{NH}}$ bond lengths (in Å) in the gas phase (GP) and formamide (FA), their difference, $\Delta$ , and type of proximity for C2-, C6-, C8- and N- $\text{NH}_2$ substituted purine tautomers.....                                                                                                       | <b>SM5</b>  |
| <b>Table S6.</b> Distance between H atom from $\text{NH}_2$ and N atom from the purine ring, $\text{H}\cdots\text{N}$ , in the gas phase (GP) and formamide (FA), their difference, $\Delta$ , and type of proximity for C2-, C6-, C8- and N- $\text{NH}_2$ substituted purine tautomers .....                                   | <b>SM6</b>  |
| <b>Table S7.</b> HOMA values of five- and six-membered rings in gas phase (GP) and formamide (FA), their difference, $\Delta$ , and $\Delta\text{HOMA}_{\text{NH}_2\text{PU-PU}}$ , for purine and analyzed $\text{NH}_2$ -substituted derivatives of purine tautomers.....                                                      | <b>SM7</b>  |
| <b>Table S8.</b> HOMA values of five- and six-membered rings in gas phase (GP) and formamide (FA), their difference, $\Delta$ , and $\Delta\text{HOMA}_{\text{NO}_2\text{PU-PU}}$ for analyzed $\text{NO}_2$ -substituted derivatives of purine tautomers.....                                                                   | <b>SM8</b>  |
| <b>Table S9.</b> Relative energies of C2-, C6-, C8- and N- $\text{NH}_2$ substituted purines.....                                                                                                                                                                                                                                | <b>SM9</b>  |
| <b>Table S10.</b> Solvation energies of C2-, C6-, C8- and N- $\text{NH}_2$ coplanar substituted purines.....                                                                                                                                                                                                                     | <b>SM10</b> |
| <b>Table S11.</b> Dipole moments, $\mu$ , of C2-, C6-, C8- and N- $\text{NH}_2$ substituted purines.....                                                                                                                                                                                                                         | <b>SM11</b> |
| <b>Figure S1.</b> NCI analysis for selected systems. Visualization of reduced density gradient isosurfaces.....                                                                                                                                                                                                                  | <b>SM12</b> |
| <b>Figure S2.</b> Change in (a) HOMA and (b) HOMED of 6- and 5-membered rings between the most polar solvent, formamide (FA) and the gas phase plotted against the HOMA value for the respective ring of aminopurines in the gas phase.....                                                                                      | <b>SM13</b> |
| <b>Calculation of HOMED index in <math>\text{NH}_2</math>-substituted purine</b> .....                                                                                                                                                                                                                                           | <b>SM14</b> |
| <b>Figure S3.</b> Values of HOMED index for 6- and 5-membered rings of C2, C6, C8 and N-amino-substituted derivatives of purine in four tautomeric forms, for the gas phase geometry .....                                                                                                                                       | <b>SM14</b> |
| <b>Figure S4.</b> Changes in HOMED index due to (a) solvation and (b) substitution.....                                                                                                                                                                                                                                          | <b>SM15</b> |
| <b>Figure S5.</b> Solvation energies of tautomers, $E_{\text{solv}}$ , for (a) C2- $\text{NH}_2$ , (b) C6- $\text{NH}_2$ (c) C8- $\text{NH}_2$ (d) N- $\text{NH}_2$ and (e) unsubstituted purines.....                                                                                                                           | <b>SM16</b> |

**Table S1.** Energy values and the difference,  $\Delta$ , in free energy values (in kcal/mol) between the coplanar ( $X_{||}$ ) and perpendicular ( $X_{\perp}$ ) conformations of  $NH_2$  relative to the plane of purine ring in  $N-NH_2$  derivatives of purine.

|    | GP          |                | H <sub>2</sub> O |                | GP         | H <sub>2</sub> O |
|----|-------------|----------------|------------------|----------------|------------|------------------|
|    | N- $X_{  }$ | N- $X_{\perp}$ | N- $X_{  }$      | N- $X_{\perp}$ | $\Delta^*$ |                  |
| 1H | -293055.94  | -293058.74     | -293071.50       | -293073.05     | -2.80      | -1.55            |
| 3H | -293055.68  | -293064.67     | -293073.01       | -293073.33     | -8.99      | -0.32            |
| 7H | -293063.05  | -293066.80     | -293075.38       | -293078.28     | -3.75      | -2.91            |
| 9H | -293068.16  | -293071.78     | -293076.60       | -293079.19     | -3.62      | -2.59            |

$$^*\Delta = N-X_{\perp} - N-X_{||}$$

**Table S2.** The cSAR(NH<sub>2</sub>) values for C2-, C6-, C8- and N-NH<sub>2</sub> substituted purine tautomers.

|       |                   | GP     | Tol    | Chf    | o-Cr   | THF    | Py     | EtOH   | DMSO   | H <sub>2</sub> O | FA     | $\Delta$                  | average |
|-------|-------------------|--------|--------|--------|--------|--------|--------|--------|--------|------------------|--------|---------------------------|---------|
| 9H    | C2                | 0.2514 | 0.2576 | 0.2600 | 0.2606 | 0.2607 | 0.2612 | 0.2614 | 0.2615 | 0.2616           | 0.2616 | 0.0102                    | 0.2597  |
| 7H    |                   | 0.2433 | 0.2453 | 0.2449 | 0.2444 | 0.2443 | 0.2436 | 0.2431 | 0.2428 | 0.2426           | 0.2425 | 0.0028                    | 0.2437  |
| 3H    |                   | 0.2784 | 0.3212 | 0.3445 | 0.3530 | 0.3548 | 0.3633 | 0.3692 | 0.3725 | 0.3740           | 0.3746 | 0.0963                    | 0.3506  |
| 1H    |                   | 0.2524 | 0.2914 | 0.3155 | 0.3241 | 0.3259 | 0.3342 | 0.3399 | 0.3429 | 0.3443           | 0.3449 | 0.0925                    | 0.3215  |
| 9H    | C6                | 0.2405 | 0.2537 | 0.2594 | 0.2611 | 0.2614 | 0.2629 | 0.2637 | 0.2642 | 0.2643           | 0.2644 | 0.0239                    | 0.2596  |
| 7H    |                   | 0.1841 | 0.2145 | 0.2339 | 0.2422 | 0.2441 | 0.2532 | 0.2592 | 0.2622 | 0.2636           | 0.2642 | 0.0801                    | 0.2421  |
| 3H    |                   | 0.2696 | 0.2870 | 0.2957 | 0.2986 | 0.2993 | 0.3021 | 0.3040 | 0.3050 | 0.3054           | 0.3056 | 0.0361                    | 0.2972  |
| 1H    |                   | 0.2439 | 0.2941 | 0.3225 | 0.3328 | 0.3351 | 0.3458 | 0.3536 | 0.3581 | 0.3602           | 0.3612 | 0.1173                    | 0.3307  |
| 9H    | C8                | 0.2595 | 0.2920 | 0.3105 | 0.3174 | 0.3189 | 0.3258 | 0.3305 | 0.3330 | 0.3342           | 0.3347 | 0.0751                    | 0.3157  |
| 7H    |                   | 0.2702 | 0.3057 | 0.3262 | 0.3340 | 0.3357 | 0.3433 | 0.3485 | 0.3512 | 0.3524           | 0.3530 | 0.0828                    | 0.3320  |
| 3H    |                   | 0.2734 | 0.2817 | 0.2847 | 0.2855 | 0.2856 | 0.2862 | 0.2865 | 0.2866 | 0.2866           | 0.2867 | 0.0132                    | 0.2843  |
| 1H    |                   | 0.2723 | 0.2745 | 0.2732 | 0.2723 | 0.2721 | 0.2709 | 0.2699 | 0.2693 | 0.2690           | 0.2689 | 0.0056                    | 0.2712  |
| 9H    | N-X <sub>  </sub> | 0.1327 | 0.1533 | 0.1642 | 0.1682 | 0.1690 | 0.1729 | 0.1756 | 0.1770 | 0.1777           | 0.1779 | 0.0452                    | 0.1668  |
| 7H    |                   | 0.1389 | 0.1664 | 0.1816 | 0.1873 | 0.1885 | 0.1941 | 0.1980 | 0.2001 | 0.2011           | 0.2015 | 0.0627                    | 0.1858  |
| 3H    |                   | 0.2021 | 0.2256 | 0.2380 | 0.2425 | 0.2434 | 0.2478 | 0.2508 | 0.2524 | 0.2531           | 0.2534 | 0.0513                    | 0.2409  |
| 1H    |                   | 0.1792 | 0.2142 | 0.2335 | 0.2406 | 0.2422 | 0.2493 | 0.2542 | 0.2568 | 0.2581           | 0.2586 | 0.0794                    | 0.2387  |
| 9H    | N-X <sub>⊥</sub>  | 0.1272 | 0.1448 | 0.1539 | 0.1572 | 0.1579 | 0.1611 | 0.1633 | 0.1645 | 0.1650           | 0.1652 | 0.0381                    | 0.1560  |
| 7H    |                   | 0.1303 | 0.1700 | 0.1709 | 0.1761 | 0.1772 | 0.1823 | 0.1859 | 0.1877 | 0.1886           | 0.1890 | 0.0587                    | 0.1758  |
| 3H    |                   | 0.1749 | 0.1944 | 0.2081 | 0.2150 | 0.2161 | 0.2215 | 0.2282 | 0.2310 | 0.2321           | 0.2326 | 0.0576                    | 0.2154  |
| 1H    |                   | 0.1673 | 0.1981 | 0.2144 | 0.2204 | 0.2217 | 0.2276 | 0.2317 | 0.2338 | 0.2349           | 0.2353 | 0.0680                    | 0.2185  |
| range |                   | 0.264  | 0.293  | 0.311  | 0.317  | 0.318  | 0.323  | 0.327  | 0.329  | 0.330            | 0.330  |                           |         |
| range | C2                | 0.0351 | 0.0759 | 0.0996 | 0.1085 | 0.1105 | 0.1197 | 0.1262 | 0.1297 | 0.1314           | 0.1321 | min                       | 0.1327* |
|       | C6                | 0.0854 | 0.0796 | 0.0885 | 0.0906 | 0.0910 | 0.0926 | 0.0944 | 0.0959 | 0.0966           | 0.0970 | max                       | 0.3746  |
|       | C8                | 0.0139 | 0.0312 | 0.0529 | 0.0616 | 0.0635 | 0.0724 | 0.0786 | 0.0819 | 0.0834           | 0.0841 | $\Delta$                  | 0.2419* |
|       | N-X <sub>  </sub> | 0.0693 | 0.0724 | 0.0738 | 0.0743 | 0.0744 | 0.0764 | 0.0786 | 0.0798 | 0.0804           | 0.0807 | *without N-X <sub>⊥</sub> |         |
|       | N-X <sub>⊥</sub>  | 0.0478 | 0.0533 | 0.0605 | 0.0632 | 0.0638 | 0.0665 | 0.0684 | 0.0694 | 0.0699           | 0.0701 |                           |         |

**Table S3.** Valence angles at the N atom and pyramidalization, angle  $\phi$ , values of the  $\text{NH}_2$  group ( $^\circ$ ) in the gas phase (GP) and water ( $\text{H}_2\text{O}$ ), their difference,  $\Delta$ , and type of proximity for C2-, C6-, C8- and N- $\text{NH}_2$  substituted purine tautomers (see Scheme 2).

|    |              | GP                                  |                                     |                         |        | $\text{H}_2\text{O}$                |                                     |                         |        | $\Delta^* \phi$ | type of proximity |
|----|--------------|-------------------------------------|-------------------------------------|-------------------------|--------|-------------------------------------|-------------------------------------|-------------------------|--------|-----------------|-------------------|
|    |              | $\text{C}_{\text{ipso}}\text{NH}_1$ | $\text{C}_{\text{ipso}}\text{NH}_2$ | $\text{H}_1\text{NH}_2$ | $\phi$ | $\text{C}_{\text{ipso}}\text{NH}_1$ | $\text{C}_{\text{ipso}}\text{NH}_2$ | $\text{H}_1\text{NH}_2$ | $\phi$ |                 |                   |
| 9H | <b>C2</b>    | 116.43                              | 117.06                              | 117.90                  | 8.62   | 116.52                              | 116.85                              | 116.31                  | 10.32  | 1.70            | 2x att            |
| 7H |              | 116.29                              | 116.43                              | 117.59                  | 9.68   | 116.00                              | 116.11                              | 115.64                  | 12.25  | 2.57            | 2x att            |
| 3H |              | 112.27                              | 117.42                              | 113.66                  | 16.65  | 116.29                              | 120.66                              | 116.78                  | 6.27   | -10.38          | mix               |
| 1H |              | 110.53                              | 115.76                              | 111.66                  | 22.05  | 119.28                              | 114.86                              | 115.00                  | 10.86  | -11.19          | mix               |
| 9H | <b>C6</b>    | 118.33                              | 119.37                              | 119.63                  | 2.67   | 118.96                              | 119.75                              | 118.48                  | 2.81   | 0.14            | 2x att            |
| 7H |              | 119.42                              | 119.84                              | 120.74                  | 0.00   | 120.14                              | 120.34                              | 119.52                  | 0.00   | 0.00            | mix               |
| 3H |              | 117.02                              | 113.07                              | 113.77                  | 16.15  | 116.81                              | 120.13                              | 116.34                  | 6.73   | -9.41           | 2x att            |
| 1H |              | 112.48                              | 118.02                              | 113.79                  | 15.72  | 118.17                              | 122.45                              | 118.05                  | 1.34   | -14.38          | mix               |
| 9H | <b>C8</b>    | 116.21                              | 112.13                              | 112.86                  | 18.79  | 115.43                              | 118.41                              | 115.01                  | 11.16  | -7.64           | mix               |
| 7H |              | 116.69                              | 112.55                              | 113.37                  | 17.38  | 119.41                              | 116.52                              | 116.11                  | 7.96   | -9.42           | mix               |
| 3H |              | 117.84                              | 117.52                              | 118.39                  | 6.26   | 118.08                              | 118.15                              | 117.18                  | 6.59   | 0.33            | 2x att            |
| 1H |              | 118.00                              | 117.84                              | 118.85                  | 5.30   | 117.77                              | 117.76                              | 116.85                  | 7.62   | 2.31            | 2x att            |
| 9H | <b>N-X  </b> | 104.44                              | 106.12                              | 104.68                  | 44.76  | 106.43                              | 105.26                              | 105.19                  | 43.12  | -1.64           | mix               |
| 7H |              | 106.05                              | 105.83                              | 104.46                  | 43.66  | 106.35                              | 106.33                              | 104.92                  | 42.40  | -1.27           | 2x rep            |
| 3H |              | 106.77                              | 108.38                              | 110.77                  | 34.08  | 106.93                              | 108.15                              | 108.70                  | 36.21  | 2.13            | mix               |
| 1H |              | 106.38                              | 106.21                              | 105.00                  | 42.41  | 107.05                              | 106.87                              | 105.66                  | 40.42  | -1.99           | 2x rep            |

\* $\Delta = \text{H}_2\text{O} - \text{GP}$

**Table S4.**  $d_{\text{ipso-NH}_2}$  bond lengths (in Å) in the gas phase (GP) and water ( $\text{H}_2\text{O}$ ), their difference,  $\Delta$ , and type of proximity for C2-, C6-, C8- and N- $\text{NH}_2$  substituted purine tautomers (see Scheme 2).

|    |              | GP                            | $\text{H}_2\text{O}$          | $\Delta^* d_{\text{ipso-NH}_2}$ | proximity type |
|----|--------------|-------------------------------|-------------------------------|---------------------------------|----------------|
|    |              | $\text{C}_{\text{ipso-NH}_2}$ | $\text{C}_{\text{ipso-NH}_2}$ |                                 |                |
| 9H | <b>C2</b>    | 1.3750                        | 1.3744                        | -0.001                          | 2x att         |
| 7H |              | 1.3776                        | 1.3791                        | 0.002                           | 2x att         |
| 3H |              | <b>1.3834</b>                 | <b>1.3597</b>                 | -0.024                          | mix            |
| 1H |              | <b>1.3931</b>                 | <b>1.3687</b>                 | -0.024                          | mix            |
| 9H | <b>C6</b>    | 1.3616                        | 1.3574                        | -0.004                          | 2x att         |
| 7H |              | 1.3861                        | 1.3652                        | -0.021                          | mix            |
| 3H |              | 1.3542                        | 1.3487                        | -0.005                          | 2x att         |
| 1H |              | 1.3752                        | 1.3468                        | -0.028                          | mix            |
| 9H | <b>C8</b>    | <b>1.3786</b>                 | <b>1.3610</b>                 | -0.018                          | mix            |
| 7H |              | <b>1.3756</b>                 | <b>1.3553</b>                 | -0.020                          | mix            |
| 3H |              | 1.3604                        | 1.3579                        | -0.002                          | 2x att         |
| 1H |              | 1.3591                        | 1.3605                        | 0.001                           | 2x att         |
| 9H | <b>N-X  </b> | 1.4207                        | 1.4158                        | -0.005                          | mix            |
| 7H |              | 1.4249                        | 1.4188                        | -0.006                          | 2x rep         |
| 3H |              | 1.4101                        | 1.4072                        | -0.003                          | mix            |
| 1H |              | 1.4294                        | 1.4209                        | -0.009                          | 2x rep         |

\*  $\Delta = \text{H}_2\text{O} - \text{GP}$

**Table S5.**  $d_{\text{NH}}$  bond lengths (in Å) in the gas phase (GP) and formamide (FA), their difference,  $\Delta$ , and type of proximity for C2-, C6-, C8- and N-NH<sub>2</sub> substituted purine tautomers (see Scheme 2).

|    | GP               |                  | FA               |                  | $\Delta^*$ $d_{\text{NH}}$ |                  | proximity type |
|----|------------------|------------------|------------------|------------------|----------------------------|------------------|----------------|
|    | N-H <sub>1</sub> | N-H <sub>2</sub> | N-H <sub>1</sub> | N-H <sub>2</sub> | N-H <sub>1</sub>           | N-H <sub>2</sub> |                |
| 9H | 1.0117           | 1.0117           | 1.0131           | 1.0128           | 0.0014                     | 0.0012           | 2x att         |
| 7H | 1.0122           | 1.0118           | 1.0136           | 1.0134           | 0.0014                     | 0.0016           | 2x att         |
| 3H | <b>1.0150</b>    | 1.0151           | 1.0124           | 1.0125           | -0.0026                    | -0.0025          | mix            |
| 1H | 1.0169           | 1.01724          | 1.0137           | 1.0137           | -0.0032                    | -0.0035          | mix            |
| 9H | 1.0113           | 1.0108           | 1.0121           | 1.0114           | 0.0009                     | 0.0006           | 2x att         |
| 7H | <b>1.0163</b>    | 1.0143           | 1.0136           | 1.0119           | -0.0027                    | -0.0024          | mix            |
| 3H | 1.0104           | 1.0110           | 1.0117           | 1.0111           | 0.0013                     | 0.0001           | 2x att         |
| 1H | <b>1.0154</b>    | 1.0169           | 1.0118           | 1.0116           | -0.0036                    | -0.0053          | mix            |
| 9H | <b>1.0159</b>    | 1.0155           | <b>1.0140</b>    | 1.0137           | -0.0019                    | -0.0018          | mix            |
| 7H | <b>1.0155</b>    | 1.0150           | 1.0129           | 1.0127           | -0.0026                    | -0.0023          | mix            |
| 3H | 1.0110           | 1.0113           | 1.0121           | 1.0123           | 0.0011                     | 0.0009           | 2x att         |
| 1H | <b>1.0109</b>    | 1.0110           | 1.0123           | 1.0126           | 0.0014                     | 0.0016           | 2x att         |
| 9H | <b>1.0277</b>    | 1.0263           | <b>1.0259</b>    | 1.0251           | -0.0018                    | -0.0012          | mix            |
| 7H | <b>1.0247</b>    | 1.0262           | 1.0238           | 1.0250           | -0.0009                    | -0.0012          | 2x rep         |
| 3H | 1.0239           | 1.0211           | 1.0236           | 1.0221           | -0.0003                    | 0.0010           | mix            |
| 1H | <b>1.0254</b>    | 1.0245           | 1.0242           | 1.0236           | -0.0012                    | -0.0009          | 2x rep         |

\*  $\Delta$  = FA – GP.

**Table S6.** Distance (in Å) between H atom from NH<sub>2</sub> and N atom from the purine ring, H...N, in the gas phase (GP) and formamide (FA), their difference, Δ, and type of proximity for C2-, C6-, C8- and N-NH<sub>2</sub> substituted purine tautomers (see Scheme 2).

| 2x att                                                                            |    | 2x rep                                                                            |                           | mix                                                                                 |                           |                          |                           |                |
|-----------------------------------------------------------------------------------|----|-----------------------------------------------------------------------------------|---------------------------|-------------------------------------------------------------------------------------|---------------------------|--------------------------|---------------------------|----------------|
| 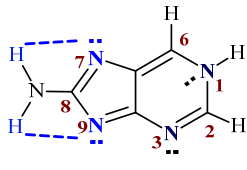 |    |  |                           |   |                           |                          |                           |                |
| C8-NH <sub>2</sub> 1H                                                             |    | N1-NH <sub>2</sub> N1                                                             |                           | C8-NH <sub>2</sub> 9H                                                               |                           |                          |                           |                |
|                                                                                   |    |                                                                                   |                           |  |                           |                          |                           |                |
|                                                                                   |    |                                                                                   |                           | N9-NH <sub>2</sub> N9                                                               |                           |                          |                           |                |
|                                                                                   |    | GP                                                                                |                           | FA                                                                                  |                           | Δ*                       |                           | proximity type |
|                                                                                   |    | H...N <sub>7,3,1</sub>                                                            | H...N <sub>9,1,7</sub>    | H...N <sub>7,3,1</sub>                                                              | H...N <sub>9,7,3</sub>    | H...N <sub>7,3,1</sub>   | H...N <sub>9,1,7</sub>    |                |
| C2                                                                                | 9H | 2.458                                                                             | 2.484                     | 2.472                                                                               | 2.487                     | 0.013                    | 0.003                     | 2x att         |
|                                                                                   | 7H | 2.460                                                                             | 2.472                     | 2.466                                                                               | 2.483                     | 0.006                    | 0.011                     |                |
| C6                                                                                | 9H | 2.515                                                                             | 2.817                     | 2.525                                                                               | 2.832                     | 0.010                    | 0.016                     |                |
|                                                                                   | 3H | 2.509                                                                             | 2.808                     | 2.510                                                                               | 2.841                     | 0.001                    | 0.033                     |                |
| C8                                                                                | 3H | 2.579                                                                             | 2.560                     | 2.594                                                                               | 2.569                     | 0.015                    | 0.009                     | mix            |
|                                                                                   | 1H | 2.555                                                                             | 2.576                     | 2.584                                                                               | 2.571                     | 0.029                    | 0.005                     |                |
|                                                                                   |    | GP                                                                                |                           | FA                                                                                  |                           | Δ*                       |                           |                |
|                                                                                   |    | H...HC <sub>6</sub>                                                               | H...HC <sub>8,2</sub>     | H...HC <sub>6</sub>                                                                 | H...HC <sub>8,2</sub>     | H...HC <sub>6</sub>      | H...HC <sub>8,2</sub>     |                |
| N-X                                                                               | N7 | 2.543                                                                             | 2.657                     | 2.554                                                                               | 2.619                     | 0.039                    | 0.011                     | 2x rep         |
|                                                                                   | N1 | 2.342                                                                             | 2.183                     | 2.322                                                                               | 2.184                     | 0.001                    | 0.020                     |                |
|                                                                                   |    | GP                                                                                |                           | FA                                                                                  |                           | Δ*                       |                           |                |
|                                                                                   |    | H...N <sub>9,7,3,1</sub>                                                          | H...HN <sub>9,7,3,1</sub> | H...N <sub>9,7,3,1</sub>                                                            | H...HN <sub>9,7,3,1</sub> | H...N <sub>9,7,3,1</sub> | H...HN <sub>9,7,3,1</sub> |                |
| C2                                                                                | 3H | 2.436                                                                             | 2.436                     | 2.482                                                                               | 2.369                     | 0.046                    | 0.067                     | mix            |
|                                                                                   | 1H | 2.426                                                                             | 2.439                     | 2.486                                                                               | 2.327                     | 0.060                    | 0.113                     |                |
| C6                                                                                | 7H | 2.444                                                                             | 2.750                     | 2.491                                                                               | 2.682                     | 0.048                    | 0.068                     |                |
|                                                                                   | 1H | 2.727                                                                             | 2.476                     | 2.822                                                                               | 2.402                     | 0.096                    | 0.074                     |                |
| C8                                                                                | 9H | 2.538                                                                             | 2.673                     | 2.589                                                                               | 2.588                     | 0.051                    | 0.085                     | mix            |
|                                                                                   | 7H | 2.537                                                                             | 2.651                     | 2.592                                                                               | 2.580                     | 0.055                    | 0.071                     |                |
|                                                                                   |    | H...N <sub>9,3</sub>                                                              | H... HC <sub>8,2</sub>    | H...N <sub>9,3</sub>                                                                | H... HC <sub>8,2</sub>    | H...N <sub>9,3</sub>     | H... HC <sub>8,2</sub>    |                |
| N-X                                                                               | N9 | 2.597                                                                             | 2.737                     | 2.646                                                                               | 2.669                     | 0.049                    | 0.067                     |                |
|                                                                                   | N3 | 2.500                                                                             | 2.307                     | 2.567                                                                               | 2.280                     | 0.067                    | 0.027                     |                |

\* Δ = FA – GP

For example: NH<sub>2</sub> group interacts by H atoms as:

- in the case of C2-NH<sub>2</sub>, 9H tautomer: H... N<sub>3</sub> and H...N<sub>1</sub>
- in the case of N7-NH<sub>2</sub>, N7 tautomer: H... HC<sub>6</sub> and H...HC<sub>8</sub>
- in the case of C2-NH<sub>2</sub>, 3H tautomer: H...N<sub>1</sub> and H...HN<sub>3</sub>

**Table S7.** HOMA values of five- and six-membered rings ( $5_{MR}$ ,  $6_{MR}$ ) in gas phase (GP) and formamide (FA), their difference,  $\Delta$ , and  $\Delta HOMA_{NH_2PU-PU}$  obtained as difference between HOMA for substituted and unsubstituted purine systems in formamide (FA) and gas phase (GP), for analyzed  $NH_2$ -substituted derivatives of purine tautomers.

derivatives of parme atomers:

| X=NH <sub>2</sub> |     | HOMA            |                 |                 |                 | Δ**             |                 | ΔHOMA <sub>NH2PU</sub> - PU |                 |                 |                 |
|-------------------|-----|-----------------|-----------------|-----------------|-----------------|-----------------|-----------------|-----------------------------|-----------------|-----------------|-----------------|
|                   |     | GP              |                 | FA              |                 |                 |                 | GP                          |                 | FA              |                 |
|                   |     | 6 <sub>MR</sub> | 5 <sub>MR</sub> | 6 <sub>MR</sub> | 5 <sub>MR</sub> | 6 <sub>MR</sub> | 5 <sub>MR</sub> | 6 <sub>MR</sub>             | 5 <sub>MR</sub> | 6 <sub>MR</sub> | 5 <sub>MR</sub> |
| 9H                |     | 0.926*          | 0.757*          | 0.920           | 0.774           | 0.006           | -0.017          |                             |                 |                 |                 |
| 7H                |     | 0.915*          | 0.752*          | 0.917           | 0.793           | -0.002          | -0.041          |                             |                 |                 |                 |
| 3H                |     | 0.761*          | 0.680*          | 0.812           | 0.726           | -0.051          | -0.046          |                             |                 |                 |                 |
| 1H                |     | 0.602*          | 0.548*          | 0.719           | 0.744           | -0.117          | -0.196          |                             |                 |                 |                 |
| 9H                | C2  | 0.919           | 0.745           | 0.914           | 0.761           | -0.005          | 0.017           | -0.007                      | -0.012          | -0.006          | -0.013          |
| 7H                |     | 0.909           | 0.757           | 0.914           | 0.798           | 0.005           | 0.040           | -0.006                      | 0.005           | -0.003          | 0.005           |
| 3H                |     | 0.801           | 0.708           | 0.856           | 0.766           | 0.055           | 0.057           | 0.040                       | 0.028           | 0.044           | 0.040           |
| 1H                |     | 0.575           | 0.527           | 0.696           | 0.625           | 0.121           | 0.098           | -0.027                      | -0.021          | -0.022          | -0.119          |
| 9H                | C6  | 0.929           | 0.802           | 0.919           | 0.818           | -0.010          | 0.016           | 0.003                       | 0.045           | -0.002          | 0.044           |
| 7H                |     | 0.927           | 0.776           | 0.919           | 0.822           | -0.008          | 0.046           | 0.012                       | 0.024           | 0.002           | 0.029           |
| 3H                |     | 0.850           | 0.840           | 0.862           | 0.850           | 0.012           | 0.010           | 0.089                       | 0.160           | 0.051           | 0.124           |
| 1H                |     | 0.720           | 0.736           | 0.803           | 0.811           | 0.083           | 0.075           | 0.118                       | 0.188           | 0.084           | 0.067           |
| 9H                | C8  | 0.922           | 0.733           | 0.907           | 0.745           | -0.015          | 0.013           | -0.004                      | -0.024          | -0.014          | -0.029          |
| 7H                |     | 0.910           | 0.726           | 0.898           | 0.759           | -0.012          | 0.034           | -0.005                      | -0.026          | -0.019          | -0.034          |
| 3H                |     | 0.716           | 0.640           | 0.754           | 0.664           | 0.037           | 0.023           | -0.045                      | -0.040          | -0.058          | -0.062          |
| 1H                |     | 0.569           | 0.493           | 0.676           | 0.582           | 0.107           | 0.088           | -0.033                      | -0.055          | -0.043          | -0.163          |
| 9H                | N-X | 0.924           | 0.780           | 0.918           | 0.790           | -0.006          | 0.010           | -0.002                      | 0.023           | -0.002          | 0.015           |
| 7H                |     | 0.899           | 0.769           | 0.902           | 0.796           | 0.004           | 0.027           | -0.016                      | 0.017           | -0.014          | 0.003           |
| 3H                |     | 0.813           | 0.736           | 0.843           | 0.766           | 0.030           | 0.030           | 0.052                       | 0.056           | 0.031           | 0.040           |
| 1H                |     | 0.641           | 0.585           | 0.746           | 0.684           | 0.106           | 0.099           | 0.039                       | 0.037           | 0.027           | -0.061          |

\* Data taken from Ref. [Jezuita, A.; Szatyłowicz, H.; Marek, P.H.; Krygowski, T.M. Aromaticity of the Most Stable Adenine and Purine Tautomers in Terms of Hückel's  $4n+2$  Principle. *Tetrahedron* **2019**, 75(35), 130474; doi: 10.1016/j.tet.2019.130474]

\*\*  $\Delta = FA - GP$

**Table S8.** HOMA values of five- and six-membered rings ( $5_{MR}$ ,  $6_{MR}$ ) in gas phase (GP) and formamide (FA), their difference,  $\Delta$ , and  $\Delta HOMA_{NO_2PU-PU}$  obtained as difference between HOMA for substituted and unsubstituted purine systems in formamide (FA) and gas phase (GP), for analyzed  $NO_2$ -substituted derivatives of purine tautomers with  $NO_2$  group in-plane of purine ring.\*

|           |    |          |          |          |          |               |          | $\Delta HOMA_{NO_2PU-PU}$ |          |          |          |
|-----------|----|----------|----------|----------|----------|---------------|----------|---------------------------|----------|----------|----------|
| X= $NO_2$ |    | GP       |          | FA       |          | $\Delta^{**}$ |          | GP                        |          | FA       |          |
|           |    | $6_{MR}$ | $5_{MR}$ | $6_{MR}$ | $5_{MR}$ | $6_{MR}$      | $5_{MR}$ | $6_{MR}$                  | $5_{MR}$ | $6_{MR}$ | $5_{MR}$ |
| 9H        | C2 | 0.922    | 0.761    | 0.909    | 0.777    | -0.013        | 0.016    | -0.004                    | 0.004    | -0.011   | 0.003    |
| 7H        |    | 0.910    | 0.749    | 0.904    | 0.784    | -0.006        | 0.035    | -0.005                    | -0.003   | -0.013   | -0.009   |
| 3H        |    | 0.704    | 0.622    | 0.742    | 0.661    | 0.038         | 0.039    | -0.057                    | -0.058   | -0.070   | -0.065   |
| 1H        |    | 0.600    | 0.530    | 0.697    | 0.624    | 0.097         | 0.094    | -0.002                    | -0.018   | -0.022   | -0.120   |
| 9H        | C6 | 0.876    | 0.724    | 0.861    | 0.735    | -0.015        | 0.011    | -0.050                    | -0.033   | -0.059   | -0.039   |
| 7H        |    | 0.882    | 0.735    | 0.874    | 0.747    | -0.008        | 0.012    | -0.033                    | -0.017   | -0.043   | -0.046   |
| 3H        |    | 0.661    | 0.560    | 0.703    | 0.605    | 0.042         | 0.045    | -0.100                    | -0.120   | -0.109   | -0.121   |
| 1H        |    | 0.425    | 0.313    | 0.547    | 0.438    | 0.122         | 0.125    | -0.177                    | -0.235   | -0.172   | -0.306   |
| 9H        | C8 | 0.904    | 0.770    | 0.902    | 0.790    | -0.002        | 0.02     | -0.022                    | 0.013    | -0.018   | 0.016    |
| 7H        |    | 0.896    | 0.763    | 0.903    | 0.804    | 0.007         | 0.041    | -0.019                    | 0.011    | -0.014   | 0.011    |
| 3H        |    | 0.782    | 0.730    | 0.833    | 0.780    | 0.051         | 0.05     | 0.021                     | 0.050    | 0.021    | 0.054    |
| 1H        |    | 0.626    | 0.601    | 0.742    | 0.702    | 0.116         | 0.101    | 0.024                     | 0.053    | 0.023    | -0.042   |

\* Data taken from Ref. [Jezuita, A.; Wiczorkiewicz, P.A.; Szatylowicz, H.; Krygowski, T.M. Solvent Effect on the Stability and Reverse Substituent Effect in Nitropurine Tautomers. *Symmetry* **2021**, *13*, 1223; doi:10.3390/sym13071223]

\*\* $\Delta$  = FA – GP



**Table S9.** Relative energies (in kcal/mol) of C2-, C6-, C8-, N-NH<sub>2</sub> substituted purines.

|              |                              | GP    | Tol   | Chf   | o-Cr  | THF  | Py    | EtOH  | DMSO  | H <sub>2</sub> O | FA    | $\Delta^*$ | <i>average</i> |
|--------------|------------------------------|-------|-------|-------|-------|------|-------|-------|-------|------------------|-------|------------|----------------|
| 9H           | <b>C2</b>                    | 0.00  | 0.00  | 0.00  | 0.00  | 0.00 | 0.00  | 0.00  | 0.00  | 0.00             | 0.00  | 0.00       | 0.00           |
| 7H           |                              | 3.59  | 2.54  | 1.81  | 1.51  | 1.44 | 1.12  | 0.90  | 0.77  | 0.71             | 0.69  | 2.91       | 1.51           |
| 3H           |                              | 12.25 | 10.30 | 9.20  | 8.79  | 8.70 | 8.30  | 8.02  | 7.87  | 7.80             | 7.77  | 4.47       | 8.90           |
| 1H           |                              | 15.92 | 12.46 | 10.35 | 9.53  | 9.35 | 8.52  | 7.93  | 7.62  | 7.47             | 7.41  | 8.51       | 9.66           |
| 9H           | <b>C6</b>                    | 0.00  | 0.00  | 0.00  | 0.00  | 0.00 | 0.00  | 0.00  | 0.00  | 0.00             | 0.00  | 0.00       | 0.00           |
| 7H           |                              | 7.18  | 5.31  | 3.98  | 3.42  | 3.30 | 2.70  | 2.27  | 2.03  | 1.91             | 1.86  | 5.32       | 3.40           |
| 3H           |                              | 7.09  | 6.00  | 5.43  | 5.22  | 5.18 | 4.98  | 4.84  | 4.77  | 4.74             | 4.72  | 2.36       | 5.30           |
| 1H           |                              | 16.94 | 13.32 | 10.97 | 10.05 | 9.85 | 8.90  | 8.23  | 7.86  | 7.69             | 7.62  | 9.32       | 10.14          |
| 9H           | <b>C8</b>                    | 0.00  | 0.00  | 0.00  | 0.00  | 0.00 | 0.00  | 0.00  | 0.00  | 0.00             | 0.00  | 0.00       | 0.00           |
| 7H           |                              | 2.62  | 1.41  | 0.57  | 0.23  | 0.15 | -0.22 | -0.48 | -0.62 | -0.69            | -0.72 | 3.34       | 0.22           |
| 3H           |                              | 2.95  | 3.14  | 3.29  | 3.35  | 3.36 | 3.42  | 3.47  | 3.49  | 3.50             | 3.51  | 0.55       | 3.35           |
| 1H           |                              | 4.93  | 3.67  | 2.88  | 2.58  | 2.51 | 2.20  | 1.98  | 1.85  | 1.80             | 1.77  | 3.16       | 2.62           |
| 9H           | <b>N-X  </b>                 | 0.00  | 0.00  | 0.00  | 0.00  | 0.00 | 0.00  | 0.00  | 0.00  | 0.00             | 0.00  | 0.00       | 0.00           |
| 7H           |                              | 5.11  | 3.52  | 2.55  | 2.18  | 2.10 | 1.71  | 1.44  | 1.29  | 1.22             | 1.19  | 3.92       | 2.23           |
| 3H           |                              | 5.66  | 4.80  | 4.33  | 4.16  | 4.12 | 3.94  | 3.82  | 3.76  | 3.73             | 3.72  | 1.94       | 4.20           |
| 1H           |                              | 12.22 | 9.08  | 7.34  | 6.69  | 6.55 | 5.90  | 5.45  | 5.21  | 5.10             | 5.06  | 7.16       | 6.86           |
| 9H           | <b>N-X<math>\perp</math></b> | 0.00  | 0.00  | 0.00  | 0.00  | 0.00 | 0.00  | 0.00  | 0.00  | 0.00             | 0.00  | 0.00       | 0.00           |
| 7H           |                              | 4.98  | 3.35  | 2.33  | 1.93  | 1.84 | 1.43  | 1.14  | 0.98  | 0.90             | 0.87  | 4.10       | 1.98           |
| 3H           |                              | 7.11  | 6.62  | 6.34  | 6.22  | 6.19 | 6.05  | 5.95  | 5.89  | 5.86             | 5.84  | 1.26       | 6.21           |
| 1H           |                              | 13.03 | 10.09 | 8.39  | 7.75  | 7.61 | 6.96  | 6.50  | 6.26  | 6.14             | 6.09  | 6.94       | 7.88           |
| <i>range</i> | <b>C2</b>                    | 15.92 | 12.46 | 10.35 | 9.53  | 9.35 | 8.52  | 8.02  | 7.87  | 7.80             | 7.77  |            |                |
|              | <b>C6</b>                    | 16.94 | 13.32 | 10.97 | 10.05 | 9.85 | 8.90  | 8.23  | 7.86  | 7.69             | 7.62  |            |                |
|              | <b>C8</b>                    | 4.93  | 3.67  | 3.29  | 3.35  | 3.36 | 3.64  | 3.95  | 4.11  | 4.19             | 4.22  |            |                |
|              | <b>N-X  </b>                 | 12.22 | 9.08  | 7.34  | 6.69  | 6.55 | 5.90  | 5.45  | 5.21  | 5.10             | 5.06  |            |                |
|              | <b>N-X<math>\perp</math></b> | 13.03 | 10.09 | 8.39  | 7.75  | 7.61 | 6.96  | 6.50  | 6.26  | 6.14             | 6.09  |            |                |

\* $\Delta$  = FA – GP

**Table S10.** Solvation energies (in kcal/mol) of C2-, C6-, C8- and N-NH<sub>2</sub> coplanar substituted purines.

|              |                        | GP   | Tol   | Chf    | o-Cr   | THF    | Py     | EtOH   | DMSO   | H <sub>2</sub> O | FA     |
|--------------|------------------------|------|-------|--------|--------|--------|--------|--------|--------|------------------|--------|
| 9H           | <b>C2</b>              | 0.00 | -3.99 | -6.10  | -6.86  | -7.03  | -7.78  | -8.29  | -8.57  | -8.70            | -8.75  |
| 7H           |                        | 0.00 | -5.04 | -7.88  | -8.95  | -9.18  | -10.25 | -10.99 | -11.39 | -11.58           | -11.66 |
| 3H           |                        | 0.00 | -5.93 | -9.15  | -10.32 | -10.57 | -11.73 | -12.52 | -12.94 | -13.14           | -13.22 |
| 1H           |                        | 0.00 | -7.44 | -11.67 | -13.25 | -13.59 | -15.18 | -16.28 | -16.87 | -17.14           | -17.26 |
| 9H           | <b>C6</b>              | 0.00 | -4.07 | -6.19  | -6.94  | -7.11  | -7.85  | -8.35  | -8.62  | -8.74            | -8.79  |
| 7H           |                        | 0.00 | -5.94 | -9.39  | -10.70 | -10.99 | -12.33 | -13.27 | -13.77 | -14.01           | -14.11 |
| 3H           |                        | 0.00 | -5.16 | -7.85  | -8.81  | -9.01  | -9.95  | -10.59 | -10.93 | -11.09           | -11.15 |
| 1H           |                        | 0.00 | -7.70 | -12.15 | -13.83 | -14.19 | -15.89 | -17.06 | -17.69 | -17.99           | -18.11 |
| 9H           | <b>C8</b>              | 0.00 | -4.95 | -7.62  | -8.59  | -8.80  | -9.77  | -10.43 | -10.78 | -10.94           | -11.01 |
| 7H           |                        | 0.00 | -6.16 | -9.67  | -10.98 | -11.27 | -12.60 | -13.52 | -14.02 | -14.25           | -14.35 |
| 3H           |                        | 0.00 | -4.76 | -7.28  | -8.19  | -8.39  | -9.30  | -9.91  | -10.24 | -10.40           | -10.46 |
| 1H           |                        | 0.00 | -6.22 | -9.67  | -10.94 | -11.22 | -12.50 | -13.39 | -13.86 | -14.08           | -14.18 |
| 9H           | <b>N-X  </b>           | 0.00 | -3.81 | -5.87  | -6.62  | -6.78  | -7.53  | -8.04  | -8.31  | -8.44            | -8.50  |
| 7H           |                        | 0.00 | -5.40 | -8.42  | -9.55  | -9.79  | -10.92 | -11.71 | -12.13 | -12.33           | -12.41 |
| 3H           |                        | 0.00 | -4.67 | -7.19  | -8.12  | -8.32  | -9.24  | -9.87  | -10.21 | -10.37           | -10.43 |
| 1H           |                        | 0.00 | -6.95 | -10.75 | -12.14 | -12.45 | -13.84 | -14.80 | -15.32 | -15.56           | -15.66 |
| 9H           | <b>N-X<sup>⊥</sup></b> | 0.00 | -3.48 | -5.26  | -5.90  | -6.03  | -6.66  | -7.08  | -7.31  | -7.41            | -7.46  |
| 7H           |                        | 0.00 | -5.10 | -7.90  | -8.94  | -9.16  | -10.20 | -10.92 | -11.30 | -11.48           | -11.56 |
| 3H           |                        | 0.00 | -3.97 | -6.02  | -6.79  | -6.95  | -7.71  | -8.24  | -8.53  | -8.66            | -8.72  |
| 1H           |                        | 0.00 | -6.42 | -9.90  | -11.18 | -11.46 | -12.73 | -13.61 | -14.08 | -14.30           | -14.40 |
| <i>range</i> | <b>C2</b>              | 0.00 | 3.45  | 5.57   | 6.38   | 6.56   | 7.40   | 7.98   | 8.30   | 8.45             | 8.51   |
|              | <b>C6</b>              | 0.00 | 3.62  | 5.97   | 6.89   | 7.09   | 8.04   | 8.71   | 9.08   | 9.25             | 9.32   |
|              | <b>C8</b>              | 0.00 | 1.46  | 2.39   | 2.79   | 2.88   | 3.31   | 3.61   | 3.78   | 3.85             | 3.89   |
|              | <b>N-X  </b>           | 0.00 | 3.14  | 4.88   | 5.53   | 5.67   | 6.32   | 6.76   | 7.00   | 7.12             | 7.16   |
|              | <b>N-X<sup>⊥</sup></b> | 0.00 | 2.94  | 4.64   | 5.28   | 5.42   | 6.07   | 6.53   | 6.78   | 6.89             | 6.94   |

**Table S11.** Dipole moments,  $\mu$ , (in D) of C2-, C6-, C8- and N-NH<sub>2</sub> substituted purines.

|              |                        | GP   | Tol   | Chf   | o-Cr  | THF   | Py    | EtOH  | DMSO  | H <sub>2</sub> O | FA    | $\Delta^*$ | average |
|--------------|------------------------|------|-------|-------|-------|-------|-------|-------|-------|------------------|-------|------------|---------|
| 9H           | <b>C2</b>              | 3.20 | 3.72  | 4.03  | 4.15  | 4.17  | 4.29  | 4.38  | 4.43  | 4.45             | 4.46  | 1.26       | 4.13    |
| 7H           |                        | 4.06 | 4.85  | 5.35  | 5.55  | 5.60  | 5.81  | 5.96  | 6.04  | 6.08             | 6.09  | 2.04       | 5.54    |
| 3H           |                        | 5.98 | 7.44  | 8.24  | 8.53  | 8.60  | 8.90  | 9.10  | 9.22  | 9.27             | 9.29  | 3.31       | 8.46    |
| 1H           |                        | 7.65 | 9.53  | 10.67 | 11.08 | 11.17 | 11.58 | 11.86 | 12.01 | 12.08            | 12.11 | 4.46       | 10.98   |
| 9H           | <b>C6</b>              | 2.37 | 2.81  | 3.06  | 3.15  | 3.17  | 3.26  | 3.33  | 3.36  | 3.38             | 3.39  | 1.01       | 3.13    |
| 7H           |                        | 6.79 | 8.19  | 9.06  | 9.41  | 9.49  | 9.87  | 10.12 | 10.25 | 10.31            | 10.34 | 3.55       | 9.38    |
| 3H           |                        | 3.94 | 4.76  | 5.20  | 5.37  | 5.40  | 5.57  | 5.68  | 5.74  | 5.77             | 5.78  | 1.84       | 5.32    |
| 1H           |                        | 8.22 | 10.27 | 11.43 | 11.86 | 11.95 | 12.39 | 12.71 | 12.88 | 12.96            | 13.00 | 4.78       | 11.77   |
| 9H           | <b>C8</b>              | 5.44 | 6.63  | 7.31  | 7.57  | 7.63  | 7.89  | 8.07  | 8.16  | 8.20             | 8.22  | 2.78       | 7.51    |
| 7H           |                        | 6.94 | 8.45  | 9.33  | 9.67  | 9.74  | 10.08 | 10.31 | 10.43 | 10.49            | 10.52 | 3.57       | 9.60    |
| 3H           |                        | 3.04 | 3.56  | 3.87  | 3.99  | 4.01  | 4.14  | 4.23  | 4.28  | 4.30             | 4.31  | 1.27       | 3.97    |
| 1H           |                        | 4.15 | 5.09  | 5.70  | 5.94  | 5.99  | 6.24  | 6.42  | 6.52  | 6.57             | 6.59  | 2.44       | 5.92    |
| 9H           | <b>N-X  </b>           | 3.95 | 4.66  | 5.05  | 5.20  | 5.23  | 5.38  | 5.49  | 5.54  | 5.57             | 5.58  | 1.63       | 5.17    |
| 7H           |                        | 6.06 | 7.14  | 7.75  | 7.99  | 8.04  | 8.27  | 8.44  | 8.53  | 8.57             | 8.59  | 2.53       | 7.94    |
| 3H           |                        | 4.59 | 5.48  | 5.98  | 6.17  | 6.21  | 6.40  | 6.53  | 6.60  | 6.63             | 6.64  | 2.06       | 6.12    |
| 1H           |                        | 7.38 | 8.92  | 9.77  | 10.09 | 10.16 | 10.48 | 10.70 | 10.81 | 10.87            | 10.89 | 3.51       | 10.01   |
| 9H           | <b>N-X<sup>⊥</sup></b> | 3.11 | 3.64  | 3.94  | 4.04  | 4.07  | 4.17  | 4.25  | 4.29  | 4.31             | 4.31  | 1.21       | 4.01    |
| 7H           |                        | 6.21 | 7.27  | 7.85  | 8.06  | 8.11  | 8.33  | 8.48  | 8.56  | 8.60             | 8.61  | 2.40       | 8.01    |
| 3H           |                        | 3.14 | 3.75  | 4.37  | 4.74  | 4.79  | 5.04  | 5.40  | 5.53  | 5.58             | 5.61  | 2.46       | 4.80    |
| 1H           |                        | 7.03 | 8.43  | 9.20  | 9.48  | 9.54  | 9.82  | 10.02 | 10.12 | 10.17            | 10.19 | 3.16       | 9.40    |
| <i>range</i> | <b>C2</b>              | 4.46 | 5.81  | 6.64  | 6.94  | 7.00  | 7.29  | 7.48  | 7.59  | 7.63             | 7.65  |            |         |
|              | <b>C6</b>              | 5.84 | 7.46  | 8.37  | 8.71  | 8.79  | 9.13  | 9.38  | 9.52  | 9.58             | 9.61  |            |         |
|              | <b>C8</b>              | 3.90 | 4.89  | 5.47  | 5.68  | 5.73  | 5.94  | 6.08  | 6.16  | 6.19             | 6.21  |            |         |
|              | <b>N-X  </b>           | 3.43 | 4.26  | 4.72  | 4.89  | 4.92  | 5.09  | 5.21  | 5.27  | 5.30             | 5.31  |            |         |
|              | <b>N-X<sup>⊥</sup></b> | 3.93 | 4.79  | 5.26  | 5.44  | 5.48  | 5.65  | 5.77  | 5.84  | 5.87             | 5.88  |            |         |

\* $\Delta$  = FA – GP

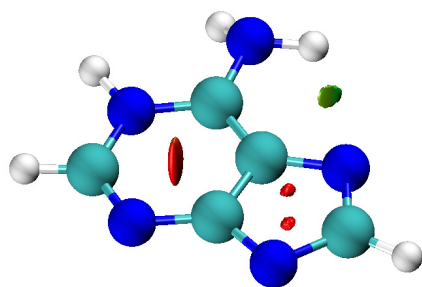

1H C6-NH<sub>2</sub>

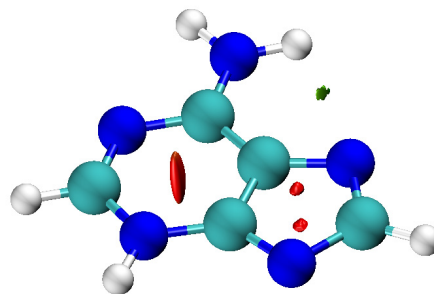

3H C6-NH<sub>2</sub>

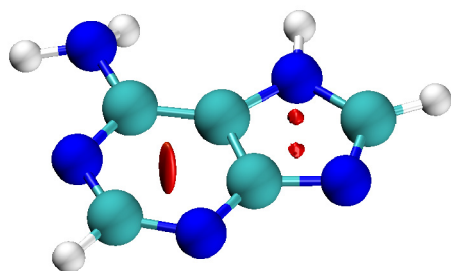

7H C6-NH<sub>2</sub>

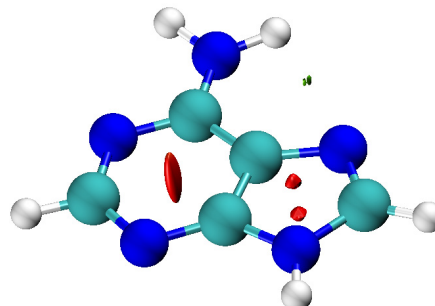

9H C6-NH<sub>2</sub>

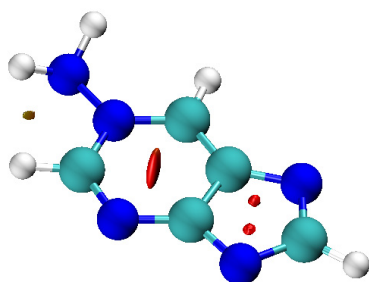

N1-NH<sub>2</sub>

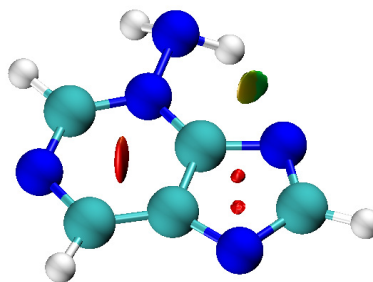

N3-NH<sub>2</sub>

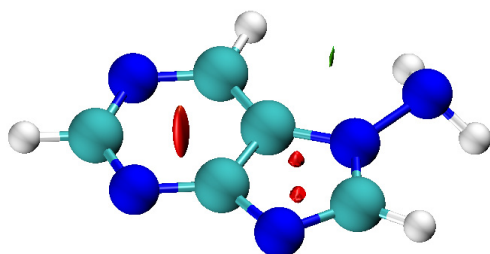

N7-NH<sub>2</sub>

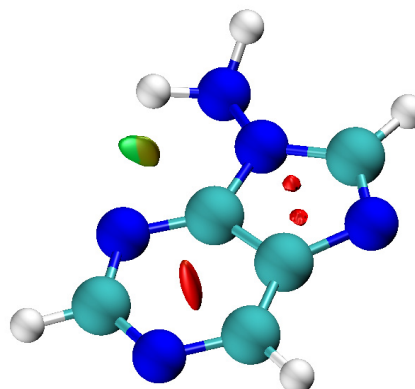

N9-NH<sub>2</sub>

**Figure S1.** NCI analysis for selected systems in the gas phase. Visualization of reduced density gradient isosurfaces (isovalue = 0.5). Coloring of isosurfaces according to the type of interaction, by the value of  $\text{sgn}(\lambda_2) \cdot \rho(r)$  ( $\lambda_2$  – 2nd eigenvalue of the electron density Hessian matrix). Red – repulsive interactions, green – weak attractive interactions (van der Waals type).

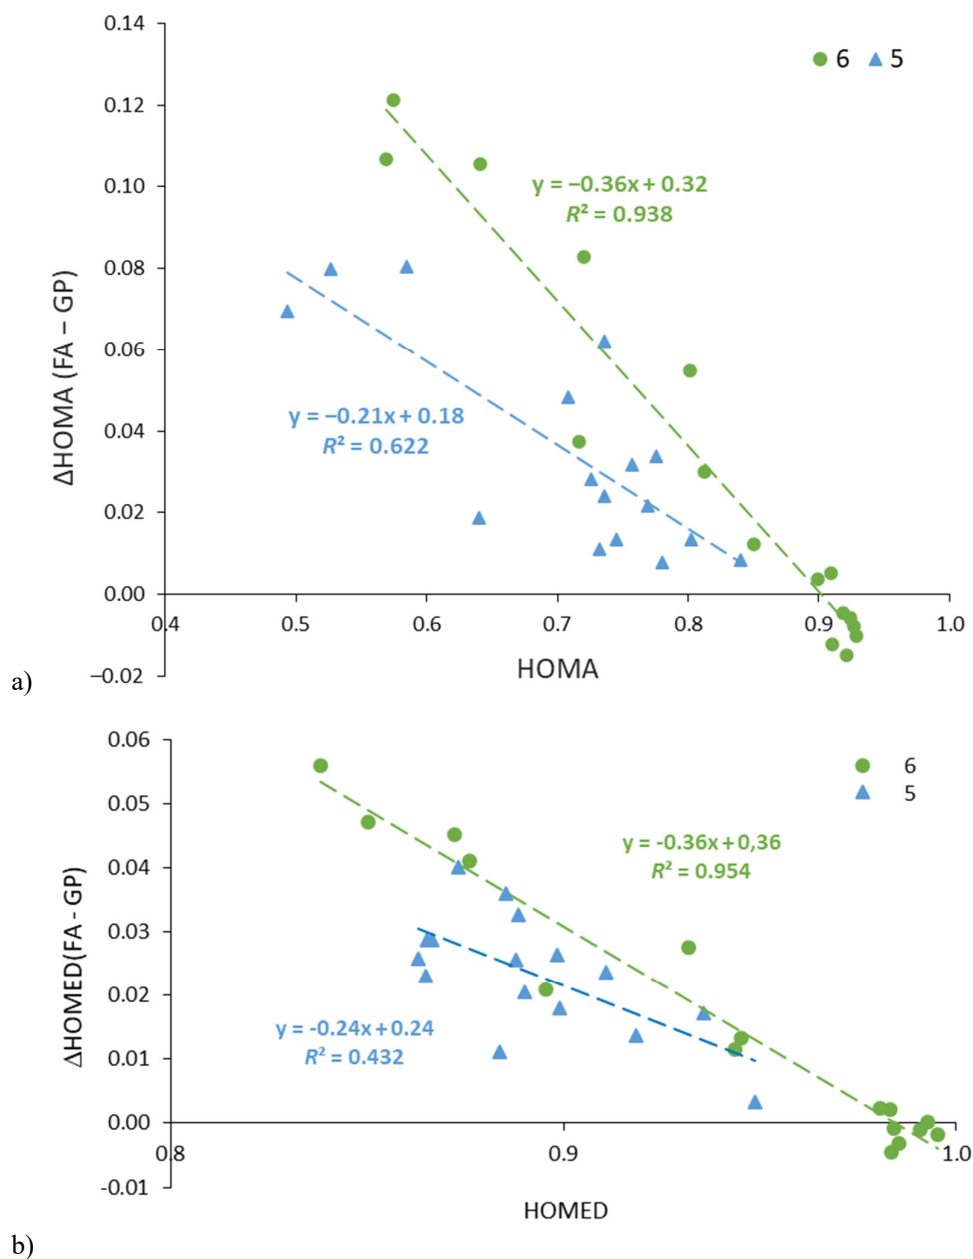

**Figure S2.** Change in (a) HOMA and (b) HOMED of 6- and 5-membered rings between the most polar solvent, formamide (FA) and the gas phase plotted against the HOMA (HOMED) value for the respective ring of aminopurines in the gas phase.

### Calculation of HOMED index in NH<sub>2</sub>-substituted purine

$$\text{HOMED} = 1 - \frac{1}{n} \sum_i^n \alpha_j (R_{\text{opt},j} - R_{j,i})^2$$

where  $n$  is the number of bonds taken into account when carrying out the summation,  $i$  means the type of bond (CC or CN),  $R_{\text{opt},j}$  is the optimal length of a given bond (for CC and CN bonds  $R_{\text{opt\_CC}} = 1.4041$  Å and  $R_{\text{opt\_CN}} = 1.3451$  Å) assumed to be realized in fully aromatic systems with HOMED = 1, and  $d_{j,i}$  is an actual bond length in the studied system,  $\alpha_j$  is an empirical normalization constant calculated for 6-membered ring ( $\alpha_{\text{CC}} = 96.43$  and  $\alpha_{\text{CN}} = 96.89$ ) and 5-membered ring ( $\alpha_{\text{CC}} = 85.77$  and  $\alpha_{\text{CN}} = 86.79$ ) according with Eqs. from Ref. [Raczyńska, E.D.; Hallman, M.; Kolczyńska, K.; Stępniewski, T. On the Harmonic Oscillator Model of Electron Delocalization (HOMED) Index and its Application to Heteroatomic  $\pi$ -Electron Systems. *Symmetry* **2010**, 2, 1485–1509, doi: 10.3390/sym2031485]:

for 6R: 
$$\alpha = 2 \cdot \{(R_{\text{opt}} - R_s)^2 + (R_{\text{opt}} - R_d)^2\}^{-1}$$

for 5R: 
$$\alpha = (2i + 1) \cdot \{(i + 1) \cdot (R_{\text{opt}} - R_s)^2 + i \cdot (R_{\text{opt}} - R_d)^2\}^{-1}$$

where  $R_s$  is the reference single CC, CN bond lengths calculated for ethane and methylamine, respectively ( $R_{s\_CC} = 1.5338$  Å and  $R_{s\_CN} = 1.4729$  Å),  $R_d$  is the reference double CC, CN bond lengths calculated for ethene and methylimine, respectively ( $R_{d\_CC} = 1.3415$  Å and  $R_{d\_CN} = 1.2794$  Å).

All parameters were calculated using B97D3/AUG-cc-pVDZ computational level.

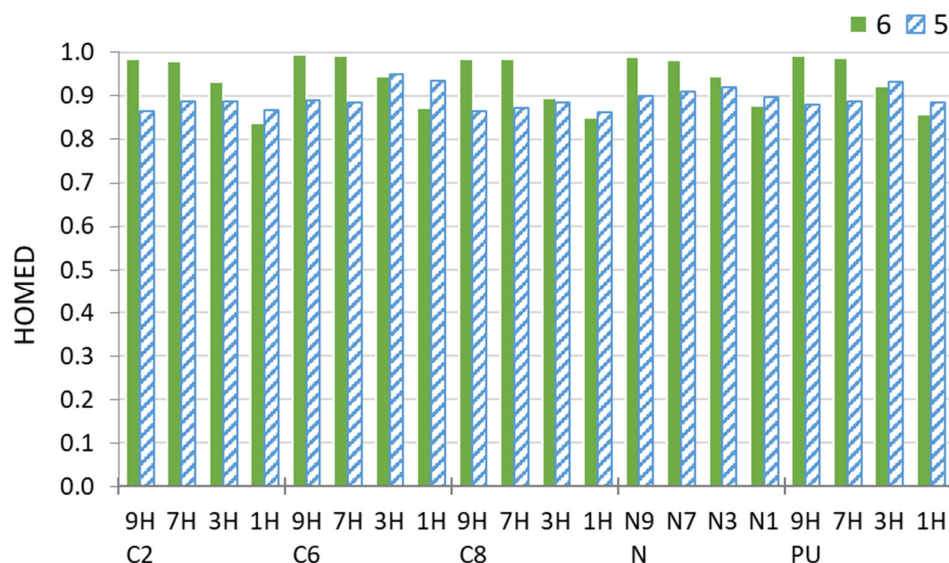

**Figure S3.** Values of HOMED index for 6- and 5-membered rings of C2, C6, C8 and N amino-substituted derivatives of purine in four tautomeric forms, calculated for the gas phase geometry. PU are the values for unsubstituted purine.

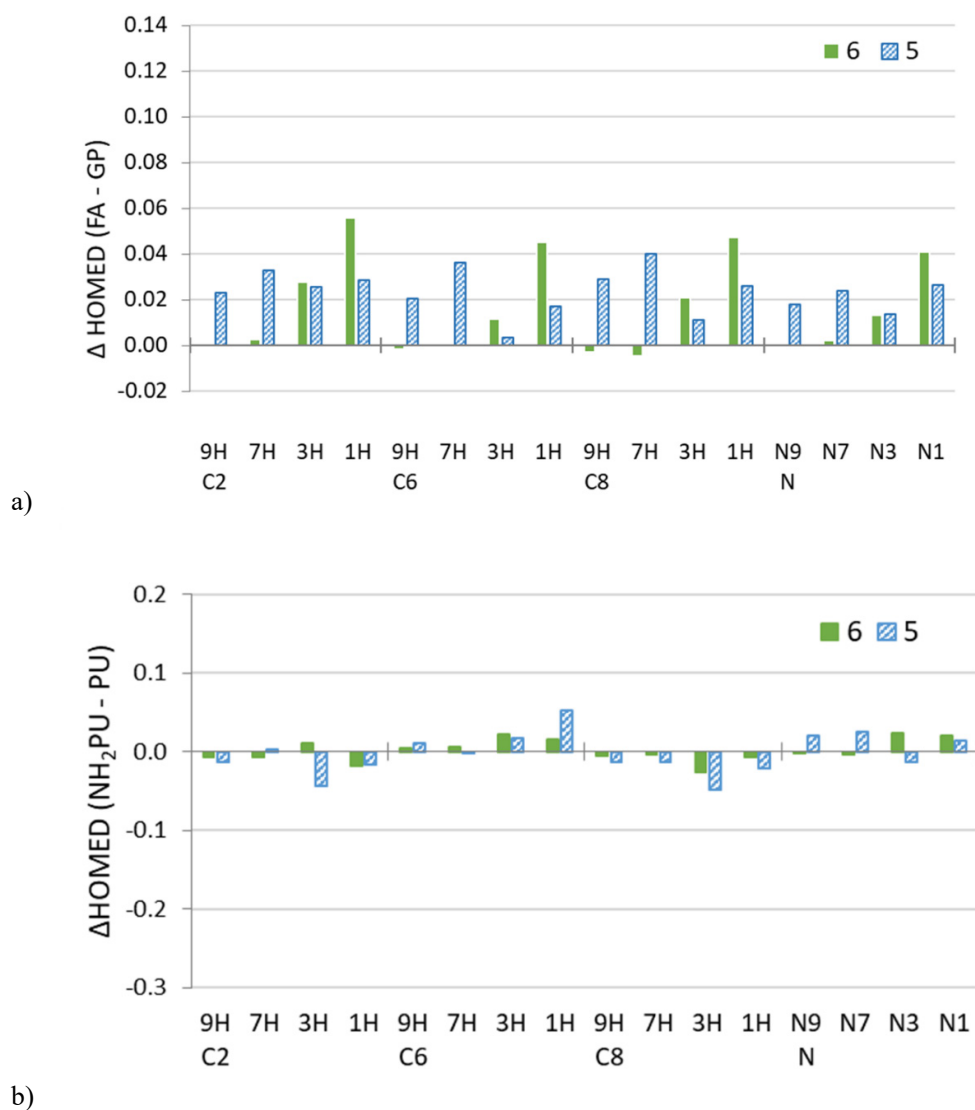

**Figure S4.** Changes in HOMED index due to (a) solvation  $\Delta\text{HOMED (FA - GP)}$ , calculated by subtracting the value in the gas phase from the value in the most polar solvent considered, formamide, and (b) substitution,  $\Delta\text{HOMED}$ , calculated by subtracting the value for unsubstituted purine (PU) from the value for substituted purine ( $\text{NH}_2\text{PU}$ ).

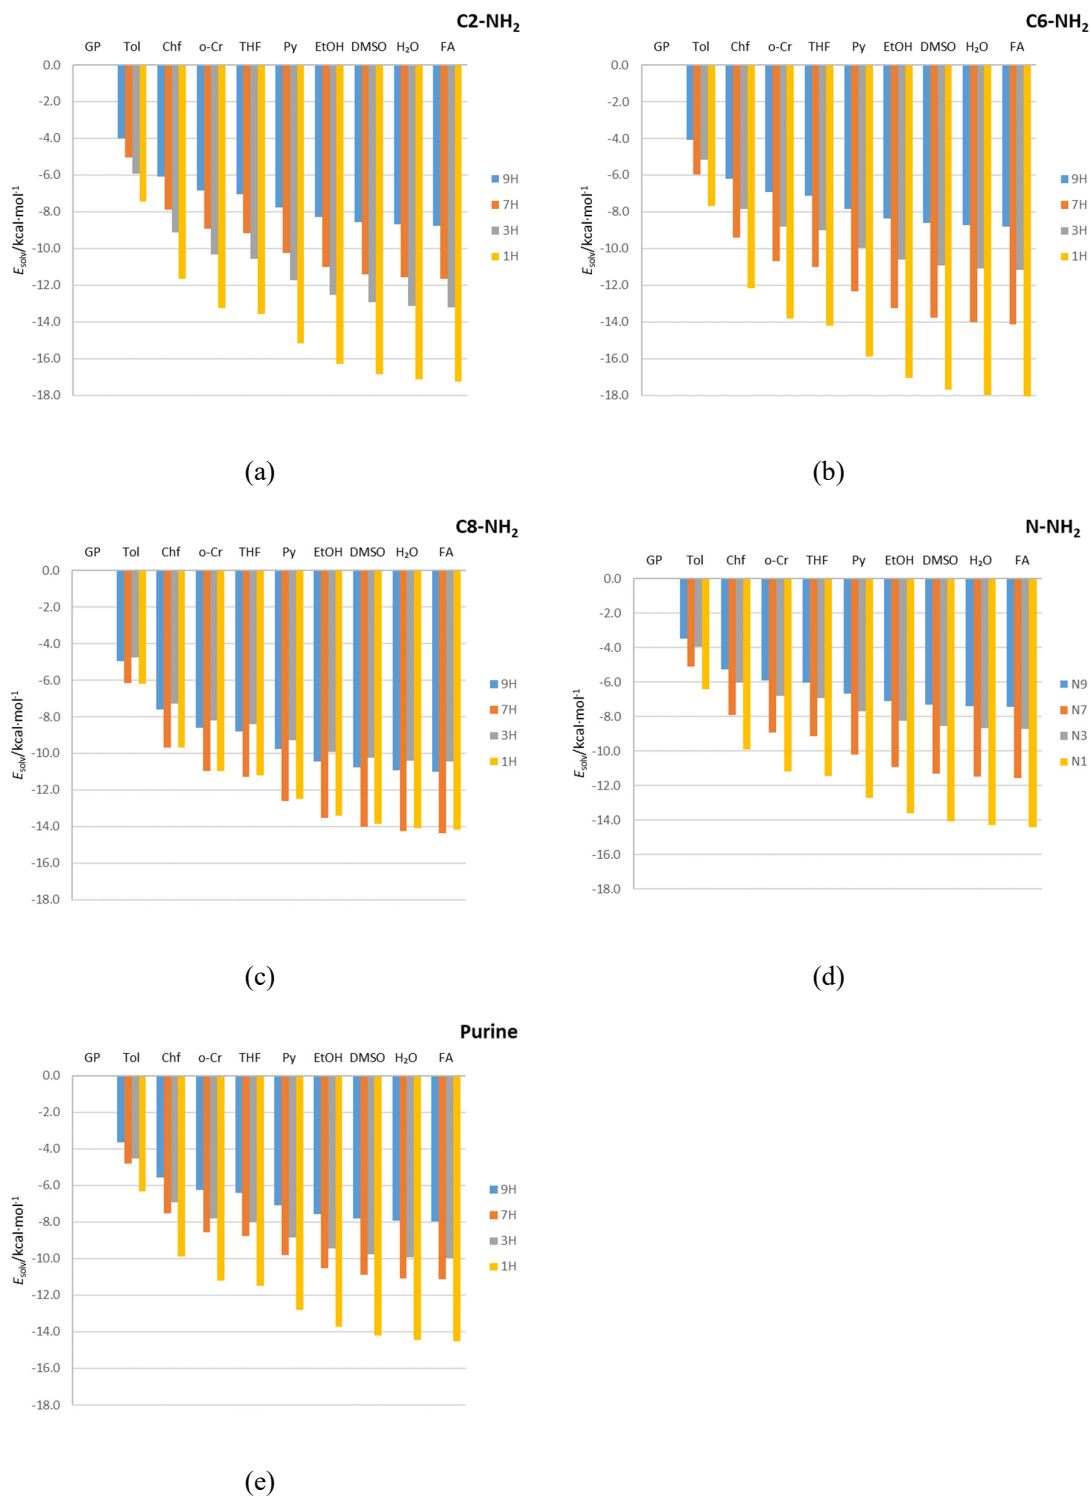

**Figure S5.** Solvation energies of tautomers,  $E_{\text{solv}}$ , for (a) C2-NH<sub>2</sub>, (b) C6-NH<sub>2</sub> (c) C8-NH<sub>2</sub> (d) N-NH<sub>2</sub> purine derivatives, and (e) unsubstituted purines.
